# Supplementary material for: Reactivity of hydroxylamine ionic liquid salts in the direct synthesis of caprolactam from cyclohexanone under mild conditions
Source: Royal Society of Chemistry journal article supplement (doi:10.1039/c6ra12918h), 2016-01-01
Supplement: c6ra12918h1.pdf [file c6ra12918h1.pdf]

**Electronic Supplementary Information**

**Reactivity of hydroxylamine ionic liquid salts in direct synthesis of caprolactam from cyclohexanone under mild conditions**

Zhihui Li,<sup>a,b</sup> Qiusheng Yang,<sup>a</sup> Liya Gao,<sup>a</sup> Yuanyuan Xu,<sup>a</sup> Dongsheng Zhang,<sup>a\*</sup> Shufang Wang,<sup>a</sup> Xinqiang Zhao<sup>a</sup> and Yanji Wang<sup>a\*</sup>

<sup>a</sup> Hebei Provincial Key Lab of Green Chemical Technology and High Efficient Energy Saving  
Hebei University of Technology

Guang Rong Dao 8, Hongqiao Distric, Tianjin 300130 (China)

E-Mail: [zds1301@hebut.edu.cn](mailto:zds1301@hebut.edu.cn); [yjwang@hebut.edu.cn](mailto:yjwang@hebut.edu.cn)

<sup>b</sup> School of Energy and Environmental Engineering

Hebei University of Technology

Tianjin 300401 (China)

## Schemes

**Scheme S1** Traditional process for synthesis of CPL

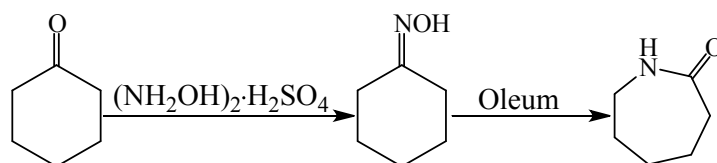

## Figures

**Figure S1 (a-d)**  $^1\text{H}$  and  $^{13}\text{C}$  NMR spectra of the two novel  $(\text{NH}_2\text{OH})_2$ -ILs

$(\text{NH}_2\text{OH})_2 \cdot [\text{HSO}_3\text{-b-N}(\text{CH}_3)_3] \cdot \text{HSO}_4$ :  $\delta\text{H}$  (400 MHz;  $\text{DMSO-d}_6$ ) 1.593(m, 2H), 1.766(t, 2H), 2.489(m, 2H), 3.025(s, 9H), 3.285(m, 2H), 8~9(bs, 20H).

$(\text{NH}_2\text{OH})_2 \cdot [\text{HSO}_3\text{-b-N}(\text{CH}_3)_3] \cdot \text{HSO}_4$ :  $\delta\text{C}$  (400 MHz,  $\text{D}_2\text{O}$ ) 20.945, 21.135, 49.889, 52.764, 65.769.

$(\text{NH}_2\text{OH})_2 \cdot [\text{HSO}_3\text{-b-Py}] \cdot \text{HSO}_4$ :  $\delta\text{H}$  (400 MHz;  $\text{DMSO-d}_6$ ) 1.562(t, 2H), 2.011(t, 2H), 2.505(t, 2H), 4.631(t, 2H), 8.173(t, 2H), 8~9(bs, 7H), 8.610(t, 1H), 9.109(d, 2H).

$(\text{NH}_2\text{OH})_2 \cdot [\text{HSO}_3\text{-b-Py}] \cdot \text{HSO}_4$ :  $\delta\text{C}$  (400 MHz,  $\text{D}_2\text{O}$ ) 20.783, 29.236, 49.871, 61.101, 128.233, 144.173, 145.613.

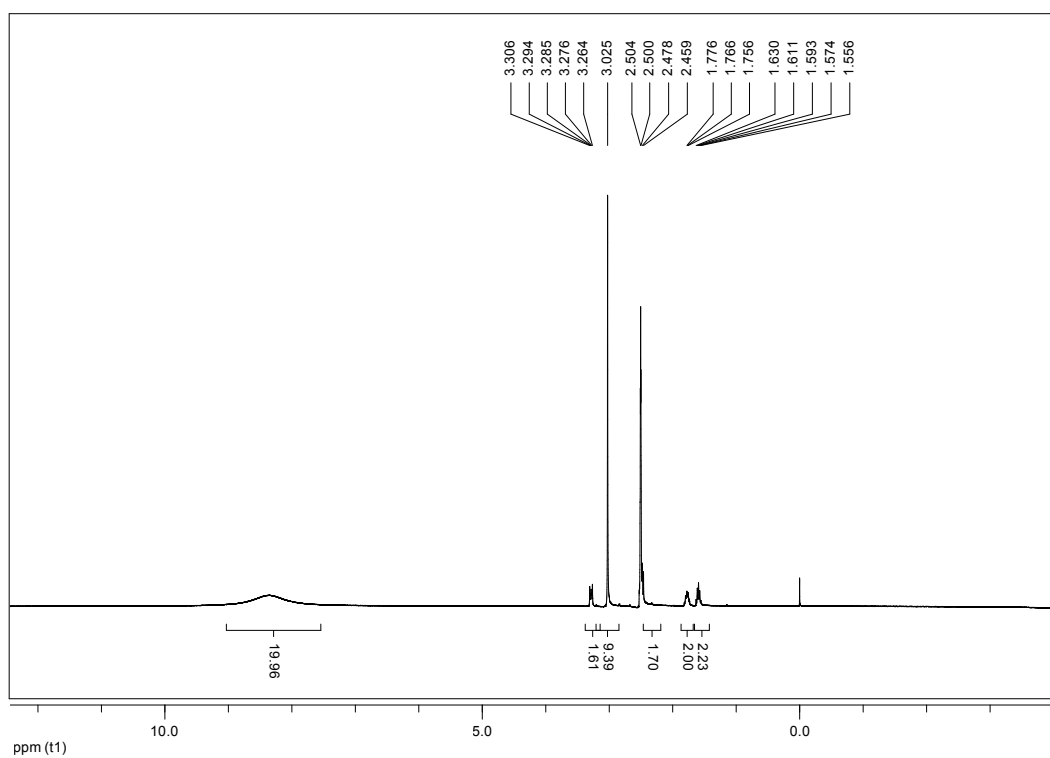

**Figure S1 (a)**  $^1\text{H}$  NMR spectra of  $(\text{NH}_2\text{OH})_2 \cdot [\text{HSO}_3\text{-b-N}(\text{CH}_3)_3] \cdot \text{HSO}_4$  ( $\text{DMSO-d}_6$ )

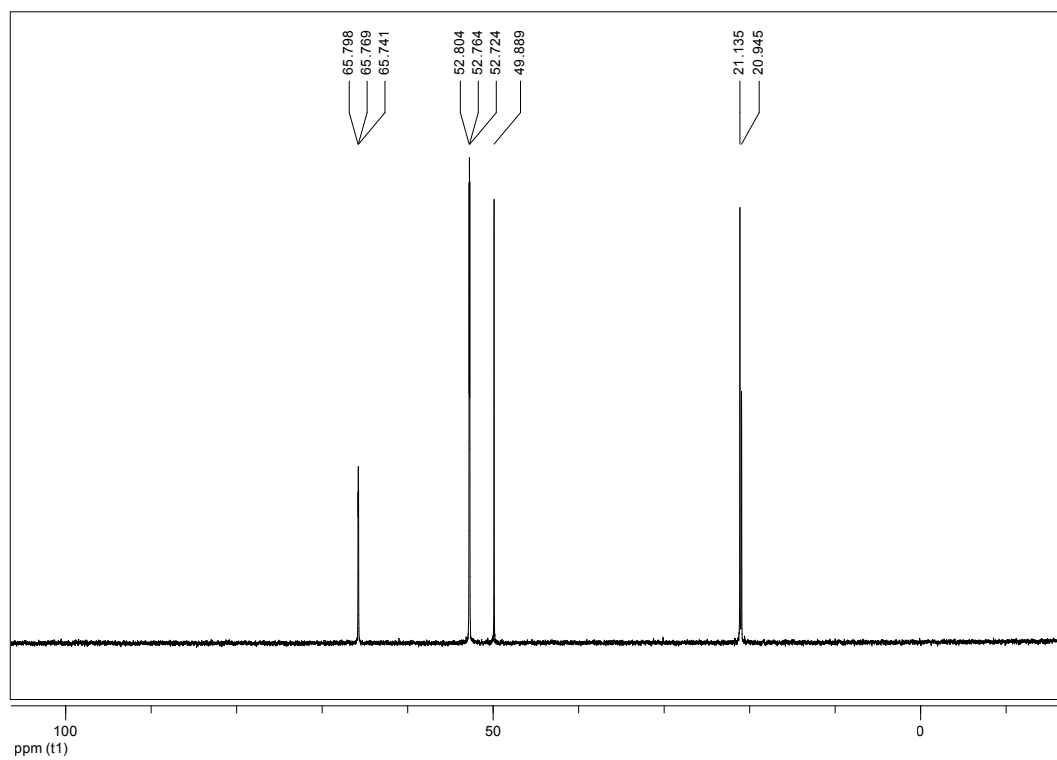

**Figure S1 (b)**  $^{13}\text{C}$  NMR spectra of  $(\text{NH}_2\text{OH})_2 \cdot [\text{HSO}_3\text{-b-N}(\text{CH}_3)_3] \cdot \text{HSO}_4$  ( $\text{D}_2\text{O}$ )

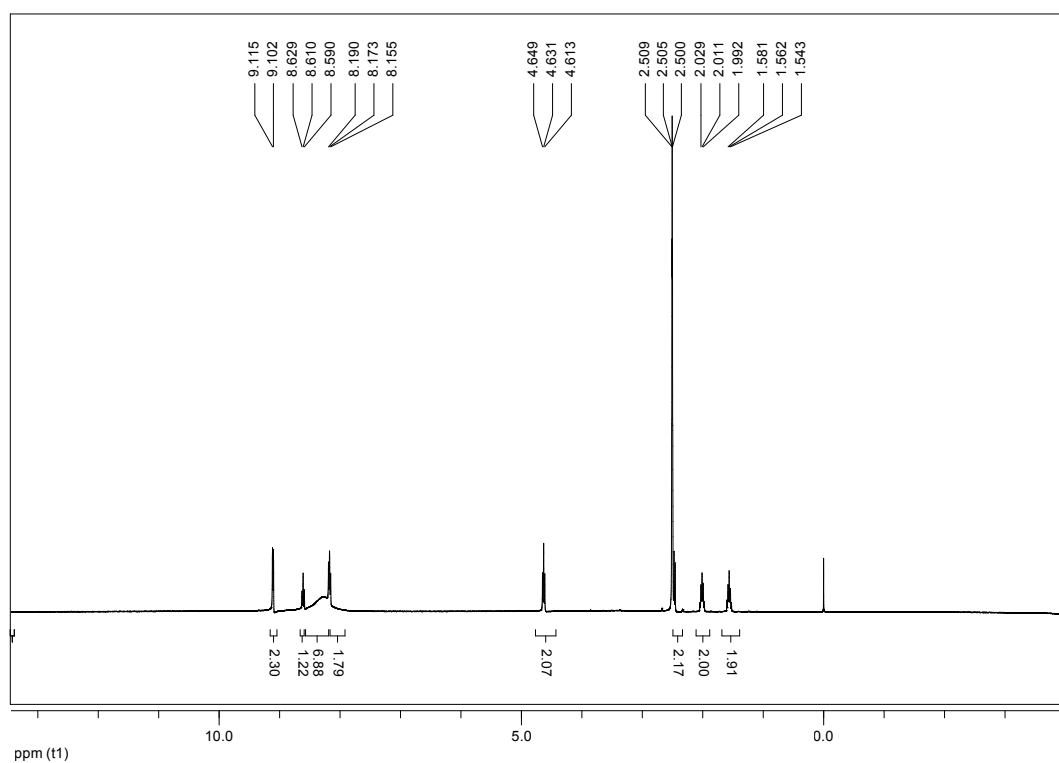

**Figure S1 (c)**  $^1\text{H}$  NMR spectra of  $(\text{NH}_2\text{OH})_2 \cdot [\text{HSO}_3\text{-b-Py}] \cdot \text{HSO}_4$  ( $\text{DMSO-d}_6$ )

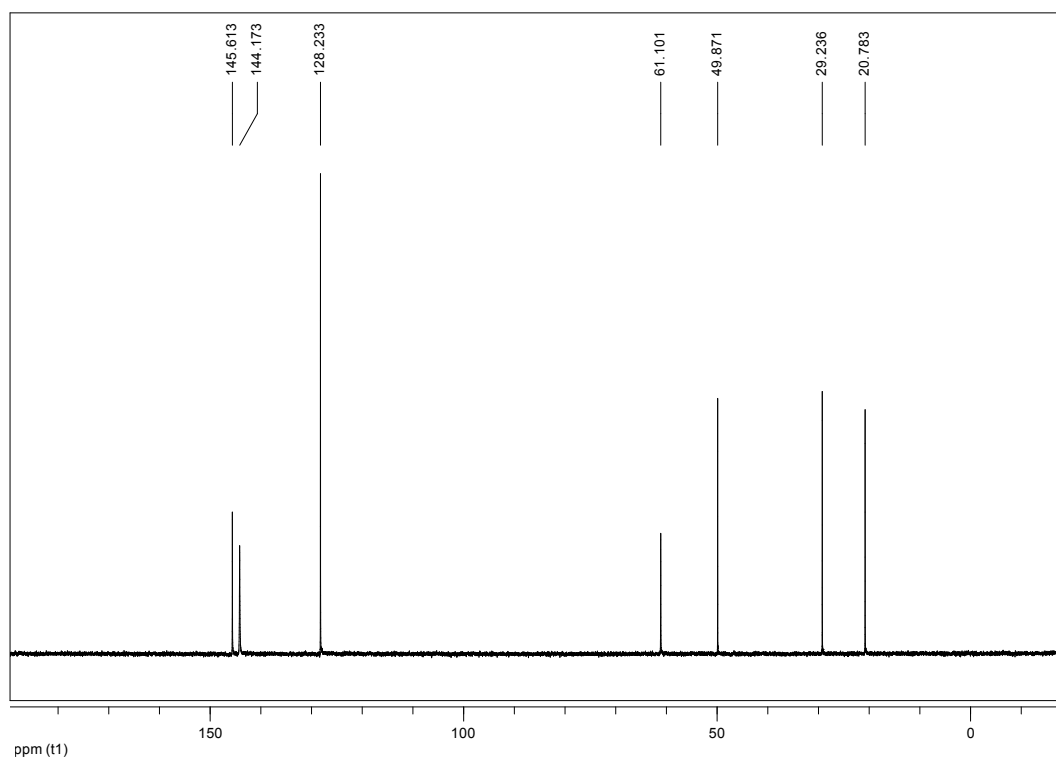

**Figure S1 (d)**  $^{13}\text{C}$  NMR spectra of  $(\text{NH}_2\text{OH})_2 \cdot [\text{HSO}_3\text{-b-Py}] \cdot \text{HSO}_4$  ( $\text{D}_2\text{O}$ )

## Tables

**Table S1** Species and corresponding frequency values of the two  $(\text{NH}_2\text{OH})_2\cdot\text{ILs}$  (Raman spectra)

| Species                     | Freequency ( $\text{cm}^{-1}$ ) |
|-----------------------------|---------------------------------|
| N-OH stretch                | 1011                            |
| OH bend, $\text{NH}_3$ rock | 1190                            |
| $\text{NH}_3$ deformation   | 1617                            |
| $\text{NH}_3$ stretch       | 2973                            |

**Table S2** Beckmann rearrangement of COX to CPL under different conditions

| No | $[\text{HSO}_3\text{-b-(CH}_3)_3]\cdot\text{H}_2\text{SO}_4$ (mmol) | $\text{ZnCl}_2$ (mmol) | $X_{\text{COX}}$ (%) | $S_{\text{CPL}}$ (%) | $S_{\text{CYC}}$ (%) |
|----|---------------------------------------------------------------------|------------------------|----------------------|----------------------|----------------------|
| 1  | 0                                                                   | 0                      | 3.4                  | 0                    | 100                  |
| 2  | 0.25                                                                | 0                      | 20.6                 | 19.2                 | 80.8                 |
| 3  | 0                                                                   | 0.75                   | 64.6                 | 91.2                 | 8.8                  |
| 4  | 0.25                                                                | 0.75                   | 98.4                 | 96.9                 | 3.7                  |

Reaction conditions: COX 5 mmol,  $[\text{HSO}_3\text{-b-(CH}_3)_3]\cdot\text{H}_2\text{SO}_4$  2.5 mmol, acetonitrile 10 mL, 80 °C, 4 h.
